# Supplementary material
Source: PubMed Central journal article supplement (PMC2581855)
Supplement: embor2008188-s1.pdf [file embor2008188-s1.pdf]

## **SUPPLEMENTAL DATA**

### **METHODS**

**NMR experiments.** Measurements were done in a buffer containing 20 mM Na<sub>2</sub>HPO<sub>4</sub> pH 6.5 and 100 mM NaCl on a Bruker DRX-600 spectrometer. Spectra were processed with program NMRPipe (Delaglio et al. 1995) and analyzed with NMRView (Johnson and Blevins 1994). Partial backbone chemical shift assignments of the AICD-C32/Fe65-PTB2 complex were obtained using standard methods (Sattler et al. 1999).

### **REFERENCES**

- Delaglio, F., Grzesiek, S., Vuister, G.W., Zhu, G., Pfeifer, J., and Bax, A. (1995). NMRPipe: a multidimensional spectral processing system based on UNIX pipes. *J Biomol NMR* 6, 277-293.
- Johnson, B.A., and Blevins, R.A. (1994). NMRview: A computer program for the visualization and analysis of NMR data. *J Biomol NMR* 4, 603-614.
- Sattler, M., Schleucher, J., and Griesinger, C. (1999). Heteronuclear multidimensional NMR experiments for the structure determination of proteins in solution employing pulsed field gradients. *Prog NMR Spectroscop* 32, 93-158.

**Figure S1** Superpositions of NMR spectra of Fe65-PTB2 with different AICD peptides. The superpositions of the  $^{15}\text{N}$ - $^1\text{H}$  heteronuclear single-quantum coherence (HSQC) spectra of the following peptide/protein complexes are shown in the given AICD/Fe65-PTB2 ratios: **(A)** Fe65-PTB2 (blue) with AICD-C32/Fe65-PTB2 (black, ratio 2:1). **(B)** AICD-C32/Fe65-PTB2 (black) and AICD-C50/Fe65-PTB2 (magenta, ratio 2:1). The two spectra superpose exactly. The AICD-C32 includes the sequence D<sup>665</sup>AAVTPEERHLSKMQQNGYENPTYKFFEQMQN. **(C)** AICD-C32/Fe65-PTB2 (black) with AICD-11mer/Fe65-PTB2 (green, ratio 6:1). The AICD-11mer includes the consensus PTB-binding sequence (N<sup>680</sup>GYENPTYKFF) as bound to other PTB domains (X11, PDB code 1x11; mDab1, PDB code 1oqn). **(D)** Free Fe65-PTB2 (blue) and both complexes with Fe65-PTB2 bound to either AICD-C32 (black) or AICD-11mer (green).

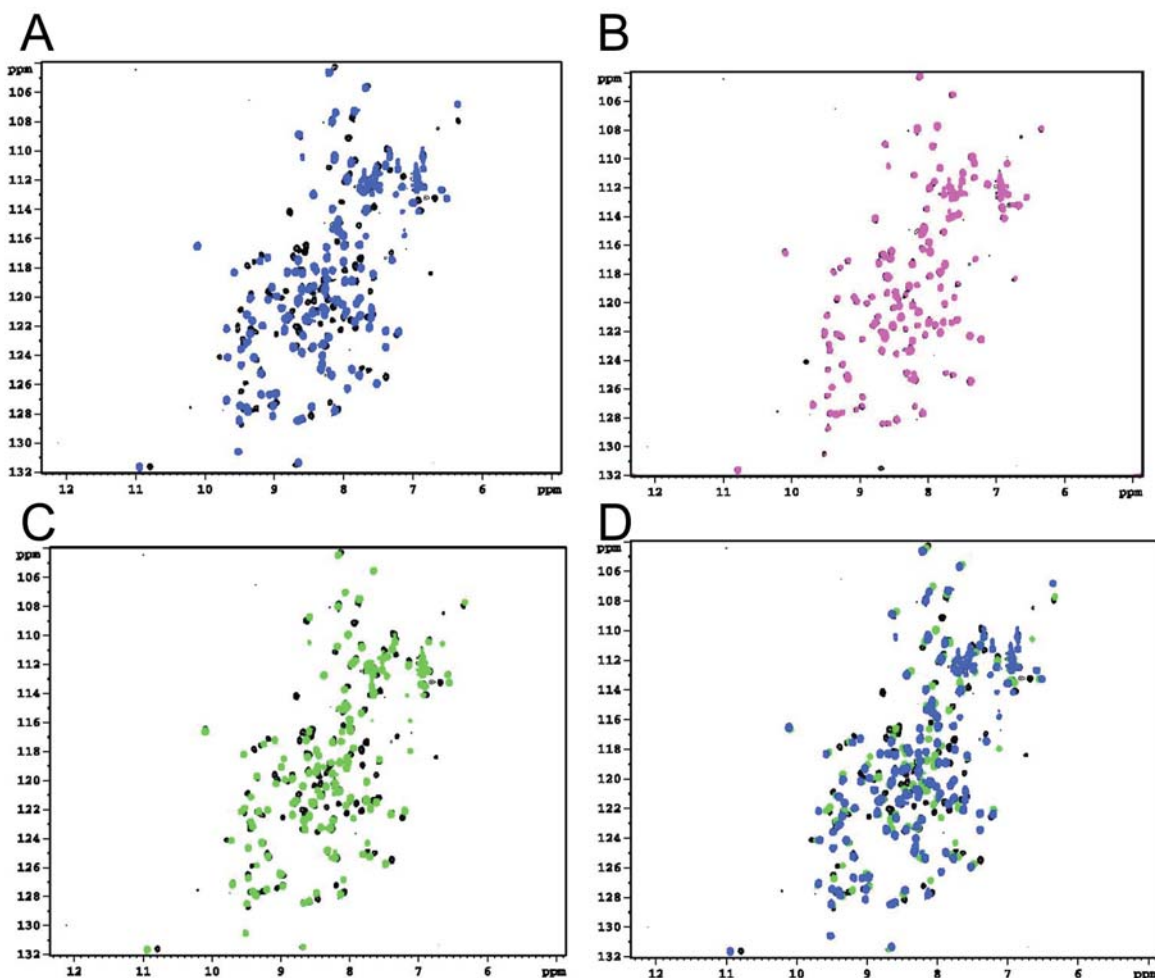

**Figure S2** Structure-based sequence alignment of Dab-like PTB domains. The sequence alignment is based on the superposition of the respective PTB domain structures (APBB3, Fe65L2: green, PDB code 2dyq; X11, red, PDB code 1x11; mDab1, blue, PDB code 1oqn). Secondary structure and numbering above the sequences corresponds to Fe65-PTB2, with the exception of helix  $\alpha 1$  (gray) of the mDab1 structure. All secondary structures are boxed within the respective sequences.

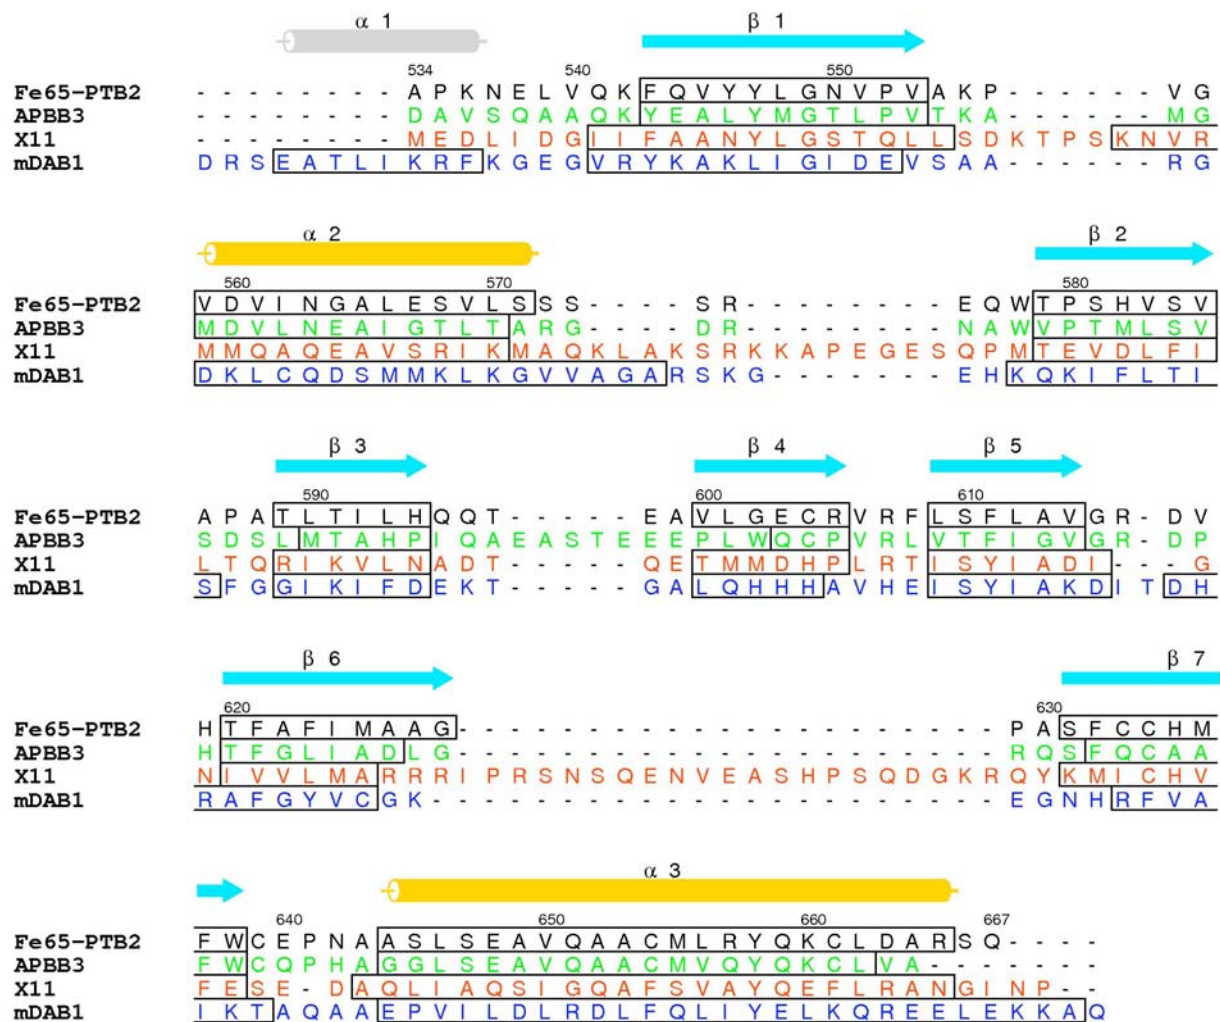

**Figure S3** Superposition of Dab-like PTB domains. Fe65-PTB2 is shown in a cartoon representation with APBB3, X11, and mDab1 superposed and shown as ribbons. Colour coding is identical to Fig. 1. Termini and secondary structures are labelled.

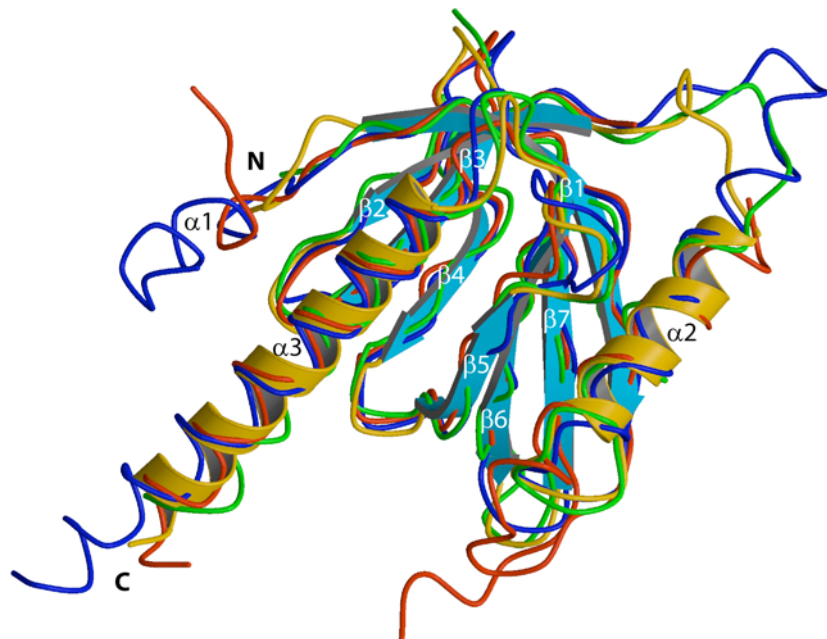

**Figure S4** The AICD/Fe65-PTB2 interface. **(A)** Surface representation of the AICD/Fe65-PTB2 complex with the AICD in blue and Fe65-PTB2 in orange (middle panel). Interacting regions are highlighted in darker colours. The outer panels are rotated and the molecules separated to have a view inside the binding interface. The view of the right panel corresponds approximately to Fig. 1a in the manuscript. **(B)** Detailed view of the AICD/Fe65-PTB2 interaction including all involved residues and given together with a semitransparent Fe65-PTB2 surface.

**A**

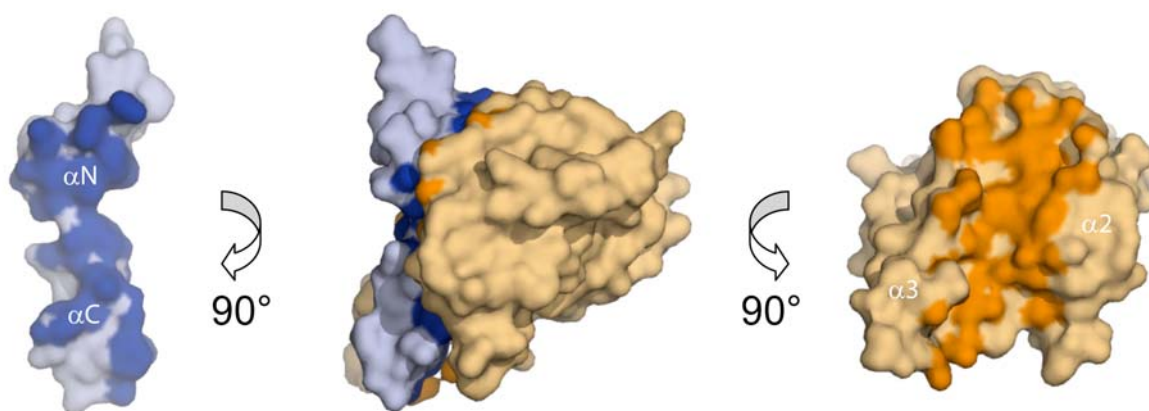

**B**

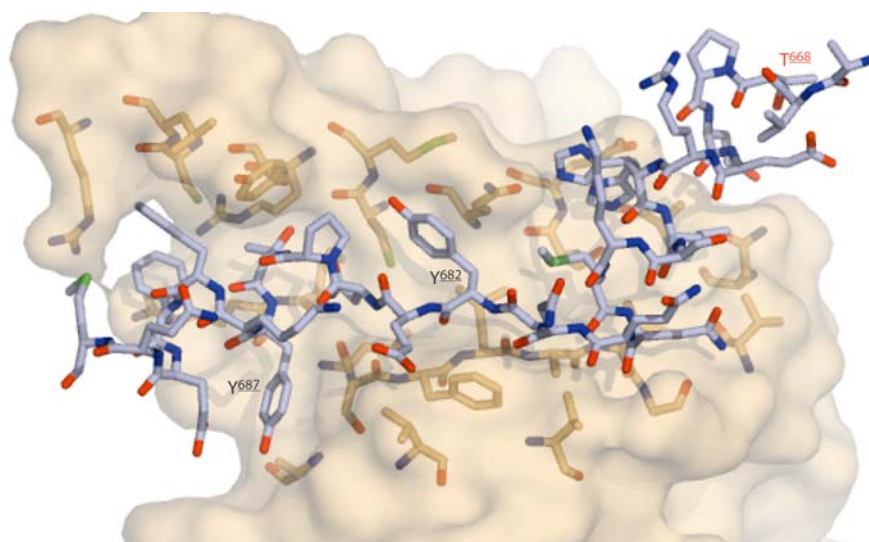

**Figure S5** Superposition of the AICD peptide bound to different PTB domains. Stereo view of the AICD peptide (residues N<sup>680</sup> to K<sup>688</sup>) in complexes with three different phosphotyrosine binding domains: Fe65-PTB2 (yellow), X11 (magenta), PDB code 1x11, and mDab1 (black), PDB code 1oqn. In the AICD/Fe65-PTB2 complex, the peptide bond of G<sup>681</sup> is flipped in respect to the other structures. In the AICD/X11 complex, Y<sup>682</sup> reveals a different sidechain conformation. In all structures the two tyrosines Y<sup>682</sup> and Y<sup>687</sup> are not phosphorylated.

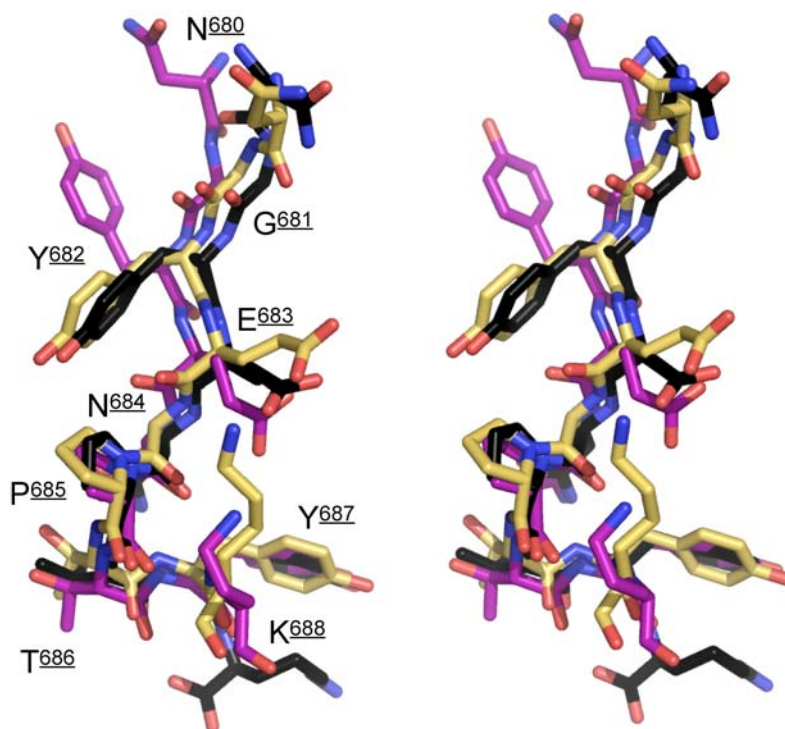

**Figure S6** NMR spectra showing the structural changes upon  $T^{668}$  phosphorylation. **(A)** Superposition of  $^{15}N$ - $^1H$  heteronuclear single-quantum coherence (HSQC) spectra of Fe65-PTB2 with either AICD-C32 unphosphorylated (black) or with  $pT^{668}$  (red) added in a 1:2 or 1:4 ratio, respectively. The shifting Fe65-PTB2 residues (N-terminus of helix  $\alpha3$  that binds to the  $T^{668}$ PEE capping box) are labelled. **(B)** Surface representation of Fe65-PTB2 in complex with AICD-C32 (shown as ribbons). Fe65-PTB2 residues revealing structural changes in the comparison of the complexes with unphosphorylated and  $pT^{668}$  AICD-C32 are coloured in red.

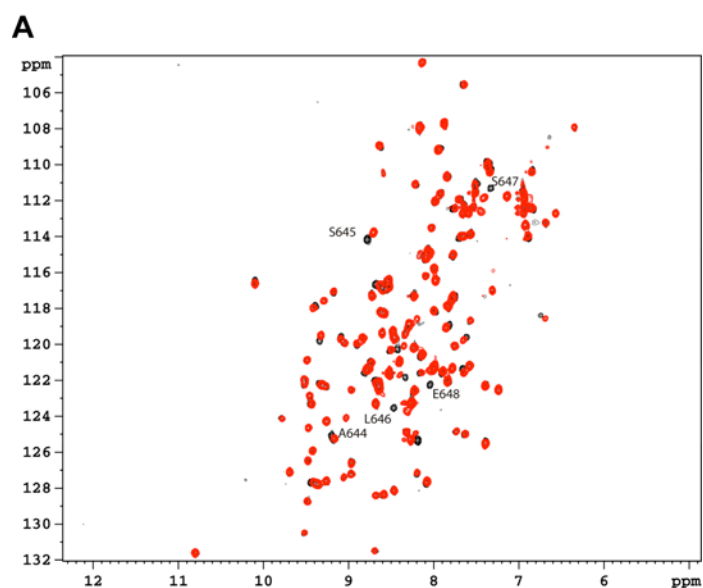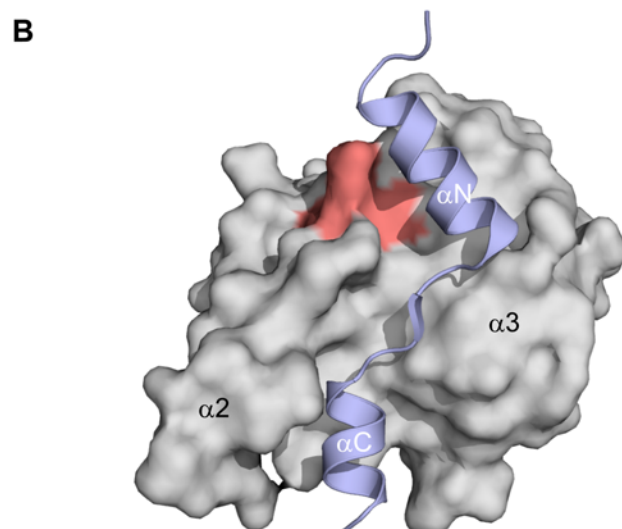

**Table S1** Refinement statistics for AICD mutant structures

| <i>Complex of Fe65-PTB2 with</i>    | <i>AICD-T668E</i> | <i>AICD-T668A</i> |
|-------------------------------------|-------------------|-------------------|
| Resolution (Å)                      | 33.7 – 2.2        | 19.3 – 2.0        |
| No. reflections                     | 27268             | 33505             |
| $R_{\text{work}} / R_{\text{free}}$ | 20.2 / 24.7       | 20.6 / 24.1       |
| No. atoms                           |                   |                   |
| Protein                             | 2441              | 2432              |
| Water molecules                     | 128               | 236               |
| $B$ -factors (Å <sup>2</sup> )      |                   |                   |
| Overall                             | 50.9              | 42.6              |
| Fe65-PTB2                           | 48.1              | 39.2              |
| AICD-C32                            | 62.0              | 52.8              |
| Water                               | 50.1              | 48.9              |
| R.m.s. deviations                   |                   |                   |
| Bond lengths (Å)                    | 0.015             | 0.019             |
| Bond angles (°)                     | 1.400             | 1.569             |
| Ramachandran plot quality (%)       |                   |                   |
| Most favoured                       | 94.1              | 95.2              |
| Additionally allowed                | 5.9               | 4.8               |
